CORRECTION

# Correction: Transcriptomic analysis to uncover genes affecting cold resistance in the Chinese honey bee (*Apis cerana cerana*)

Kai Xu, Qingsheng Niu, Huiting Zhao, Yali Du, Yusuo Jiang

In the Funding section, the grant number from the funder National Nature Science Foundation of China is listed incorrectly. The correct grant number is: 31372386.

## Reference

1. Xu K, Niu Q, Zhao H, Du Y, Jiang Y (2017) Transcriptomic analysis to uncover genes affecting cold resistance in the Chinese honey bee (*Apis cerana cerana*). PLoS ONE 12(6): e0179922. doi:[10.1371/journal.pone.0179922](https://doi.org/10.1371/journal.pone.0179922) PMID: [28650988](https://pubmed.ncbi.nlm.nih.gov/28650988/)

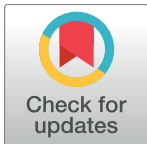

## OPEN ACCESS

**Citation:** Xu K, Niu Q, Zhao H, Du Y, Jiang Y (2017) Correction: Transcriptomic analysis to uncover genes affecting cold resistance in the Chinese honey bee (*Apis cerana cerana*). PLoS ONE 12(8): e0184468. <https://doi.org/10.1371/journal.pone.0184468>

**Published:** August 31, 2017

**Copyright:** © 2017 Xu et al. This is an open access article distributed under the terms of the [Creative Commons Attribution License](https://creativecommons.org/licenses/by/4.0/), which permits unrestricted use, distribution, and reproduction in any medium, provided the original author and source are credited.
